# Supplementary material for: Low-voltage-driven organic phototransistors based on a solution-processed organic semiconductor channel and high k hybrid gate dielectric
Source: Royal Society of Chemistry journal article supplement (doi:10.1039/c7tc03455e), 2017-01-01
Supplement: c7tc03455e1.pdf [file c7tc03455e1.pdf]

## Electronic Supplementary Information

### **Low-voltage-driven organic phototransistors based on a solution-processed organic semiconductor channel and high $k$ hybrid gate dielectric**

Bo-Yi Jiang,<sup>a</sup> Sureshraj V. Vegiraju,<sup>b</sup> Anthony Shiaw-Tseh Chiang,<sup>a</sup> Ming-Chou Chen<sup>\*b</sup> and  
Cheng-Liang Liu<sup>\*a</sup>

<sup>a</sup>Department of Chemical and Materials Engineering, National Central University, Taoyuan,  
32001 Taiwan

<sup>b</sup>Department of Chemistry, National Central University, Taoyuan 32001, Taiwan. E-mail:  
mcchen@ncu.edu.tw

\*E-mail: mcchen@ncu.edu.tw, clliu@ncu.edu.tw

## **Experimental**

### **Materials**

All the solvents and reagents were purchased from Sigma-Aldrich, Merck and Alfa Aesar and used without further purification. The preparation of *h*TSO sol precursor and **DDTT-SBT-14** organic semiconductors was according to the pervious literature.<sup>1,2</sup>

### **Characterization**

Film thickness was measured with DEKTAK 150 Surface Profilometer (Veeco). Polarized optical micrographs were obtained by Leica 2700M. UV-Vis spectrum was characterized by JASCO V-670 UV-Vis spectrophotometer. The atomic force microscope (AFM, Seiko SPA400) was operated under tapping mode at room temperature to investigate the surface roughness. Etched silicon tips with a typical resonant frequency of 160 kHz were employed.

### **Device fabrication and measurement**

Heavily doped n-type Si wafer was diced and cleaned in sulfuric acid/hydrogen peroxide (7:3 v/v) at 110 °C for 40 min, rinsed thoroughly with DI water, dried under nitrogen and used immediately. The *h*TSO dielectric films were deposited by spin-coating the precursor sol onto cleaned Si substrate (6000 rpm, 60 s), then cured under ultraviolet light and baked at 400 °C for 1 h before cooled to room temperature. The as-fabricated *h*TSO films were then immersed in a (2-phenylethyl)trichlorosilane (PETS) solution (5 mM in toluene) at 55 °C for 1 h, followed by rinsing with toluene and blow dried with nitrogen. Solution-shearing organic semiconductors thin films developed by Bao's group<sup>3</sup> were prepared through customized

shearing machine where the upper shearing plate (modified with n-octadecyltrichlorosilane (ODTS)) dragged the placed solution (~20  $\mu\text{l}$ ) on a heated substrate (50~55  $^{\circ}\text{C}$ ) at a controlled shearing rate of 15  $\mu\text{m s}^{-1}$ . Following that, source and drain electrodes were defined on top of the organic semiconducting layer by evaporating a 50 nm thick gold film at 0.5  $\text{\AA s}^{-1}$  through a shadow mask. The channel width ( $W$ ) and length ( $L$ ) are 25  $\mu\text{m}$  and 1500  $\mu\text{m}$ , respectively. The capacitance per area ( $C$ ) of  $h\text{TSO}$  gate dielectric was obtained by measuring capacitance-voltage properties of Si/ $h\text{TSO}$ /Au with Agilent E4980A LCR meter. The saturated field effect mobility ( $\mu$ ) and threshold voltage ( $V_{th}$ ) was estimated in the saturation region from the slope and x-intercept, respectively, of the linear fit of  $(-I_d)^{1/2}$  versus  $V_g$  data, using the following Eq. (S1):

$$I_d = \frac{W}{2L} C \mu (V_g - V_{th})^2 \quad (\text{S1})$$

The subthreshold swing ( $SS$ ) is calculated by taking the inverse slope of a plot of logarithmic  $I_d$  versus  $V_g$  in field effect transistor operating region. The blue LED was directly used for irradiation. Two important parameters for organic transistor, namely, photoresponsibility ( $R$ ) and photosensitivity ( $P$ ), based on following fundamental equation.

$$R = \frac{I_{ill} - I_{dark}}{P_{ill}} \quad (\text{S2})$$

$$P = \frac{I_{ill} - I_{dark}}{I_{dark}} \quad (\text{S3})$$

$I_{ill}$ : the drain current with illumination (A)

$I_{dark}$ : the drain current in darkness (A)

$P_{ill}$ : the incident power (W)

1. B.-X. Yang, C.-Y. Tseng, A. S.-T. Chiang and C.-L. Liu, *J. Mater. Chem. C*, 2015, **3**, 968-972.
2. S. Vegiraju, B.-C. Chang, P. Priyanka, D.-Y. Huang, K.-Y. Wu, L.-H. Li, W.-C. Chang, Y.-Y. Lai, S.-H. Hung, B.-C. Yu, C.-L. Wang, W.-J. Chang, C.-L. Liu, M.-C. Chen and A. Facchetti, *Adv. Mater.*, DOI: 10.1002/adma.201702414, 1702414.
3. G. Giri, E. Verploegen, S. C. B. Mannsfeld, S. Atahan-Evrenk, D. H. Kim, S. Y. Lee, H. A. Becerril, A. Aspuru-Guzik, M. F. Toney and Z. Bao, *Nature*, 2011, **480**, 504-508.

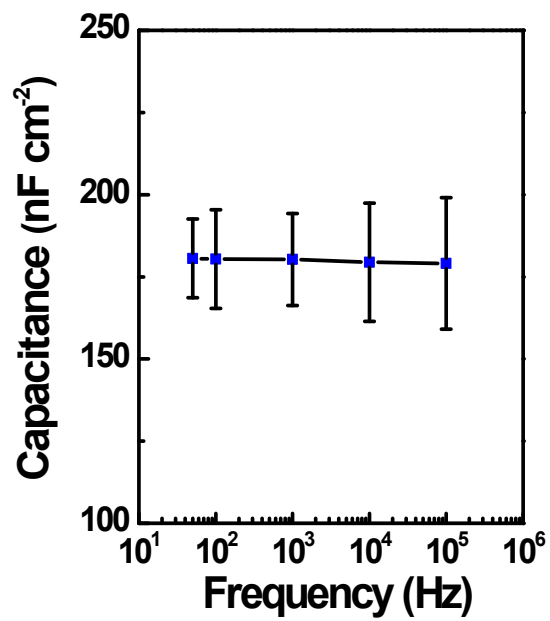

**Fig. S1** Areal capacitance versus frequency of *h*TSO dielectric film.

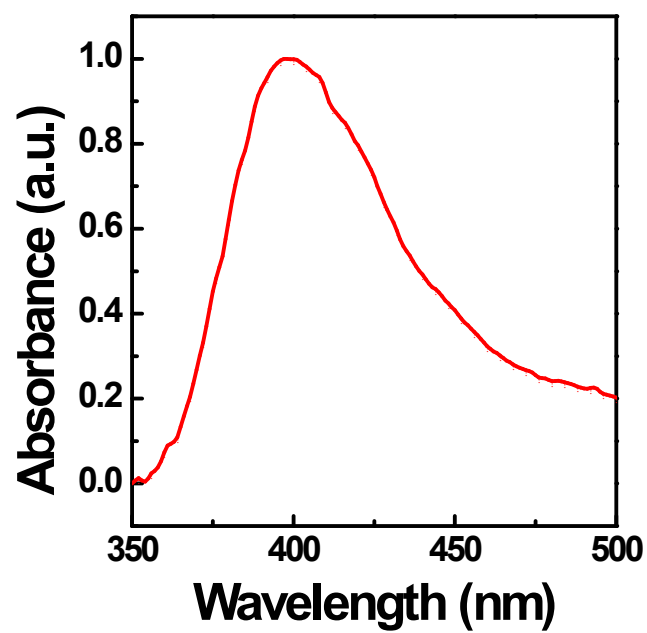

**Fig. S2** UV-Vis spectrum of solution-sheared **DDTT-SBT-14** thin film.

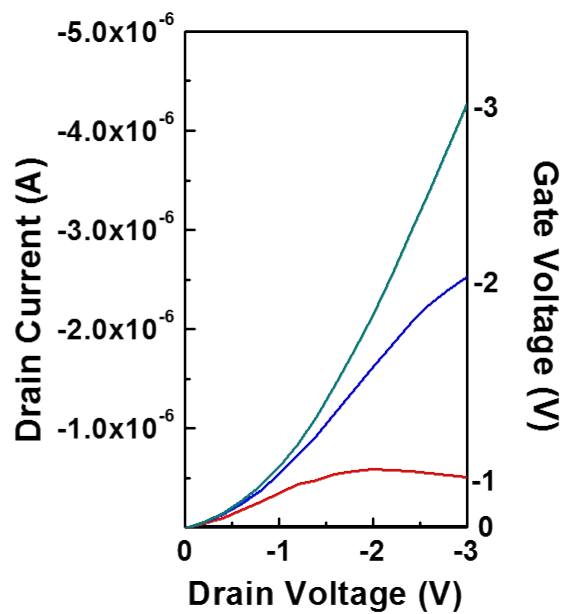

**Fig. S3** Output characteristics of DDTT-SBT-14 based organic transistor in dark.

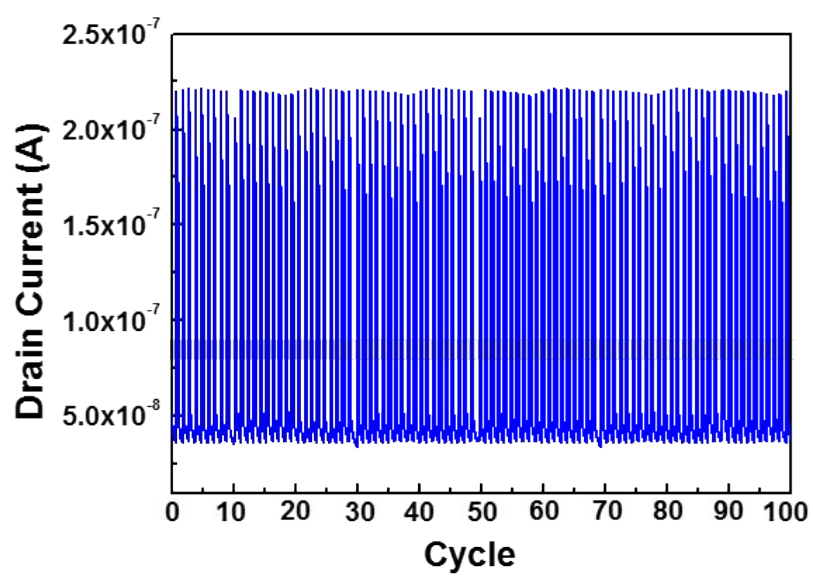

**Fig. S4** ON/OFF cycles test of **DDTT-SBT-14** based organic phototransistor.
